# Supplementary material
Source: MDPI journal article supplement (https://www.mdpi.com/2311-7524/9/4/516)
Supplement: s1 [file s1]

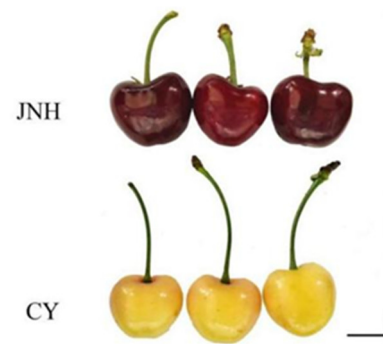

**Figure S1.** Fruit morphology of JNH and CY are shown. The bars of the sections are 1.0 cm.

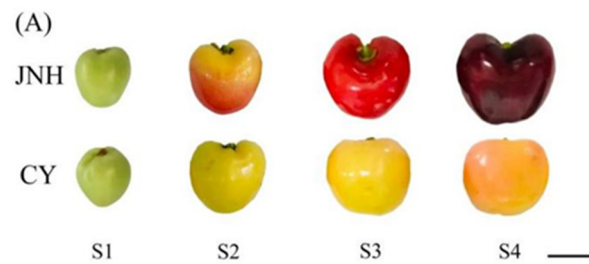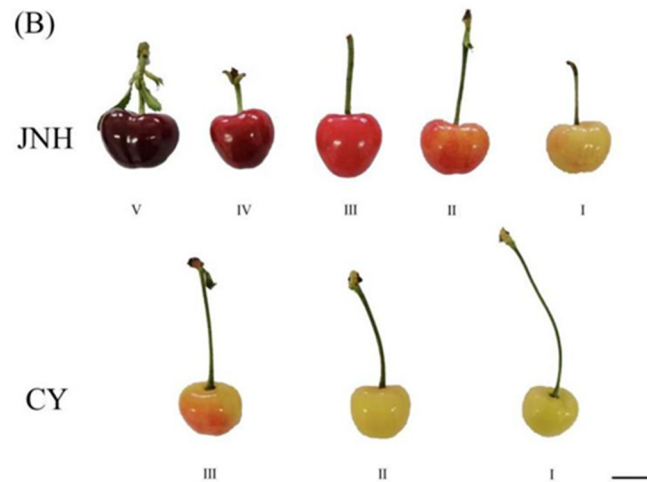

**Figure S2.** Different ripening stages (A) and maturity level (B) of JNH and CY were showed. The bars of the sections are both 1.0 cm.

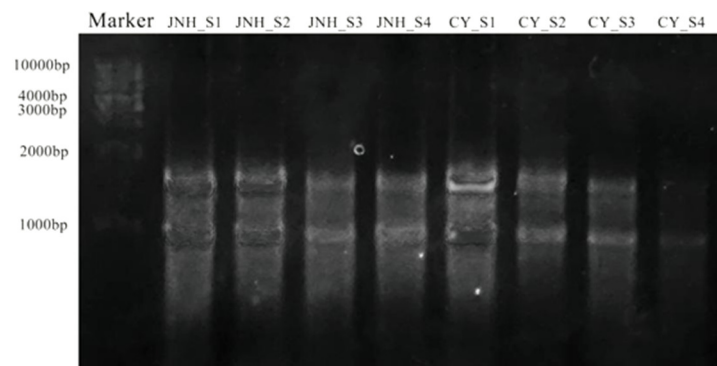

**Figure S3.** The agarose gel electrophoresis (1.5%) testing of the integrity of RNA.

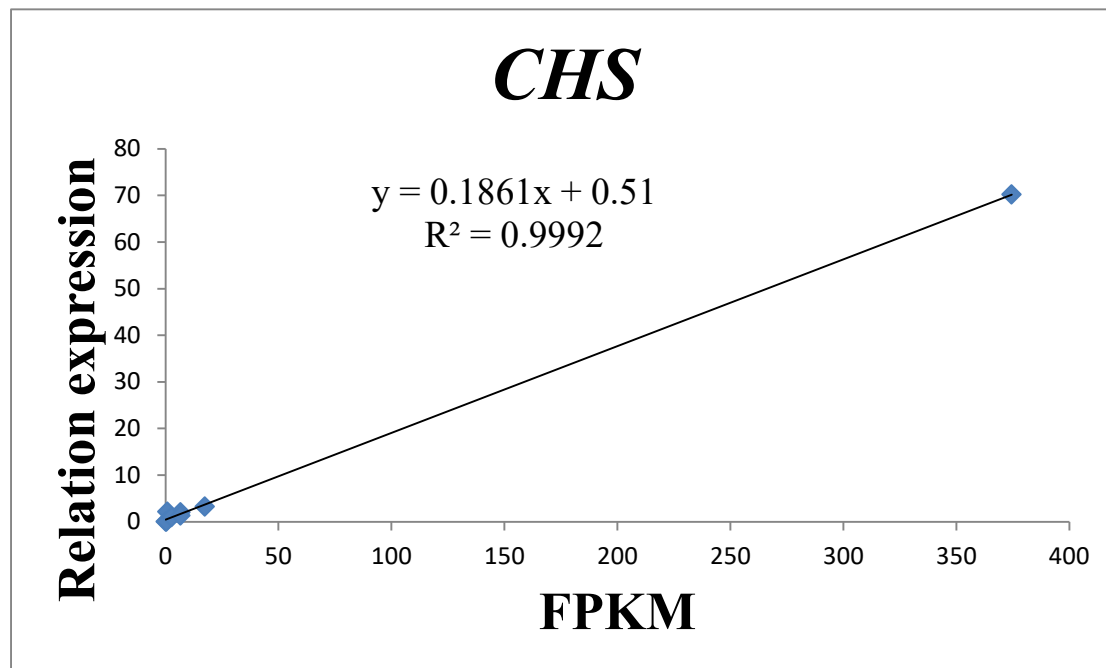

***CHI***

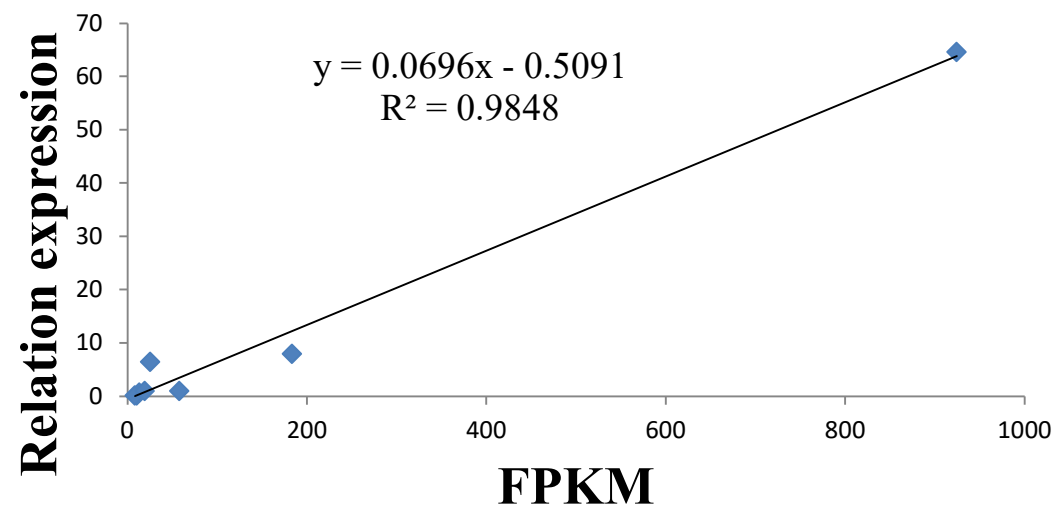

***F3H***

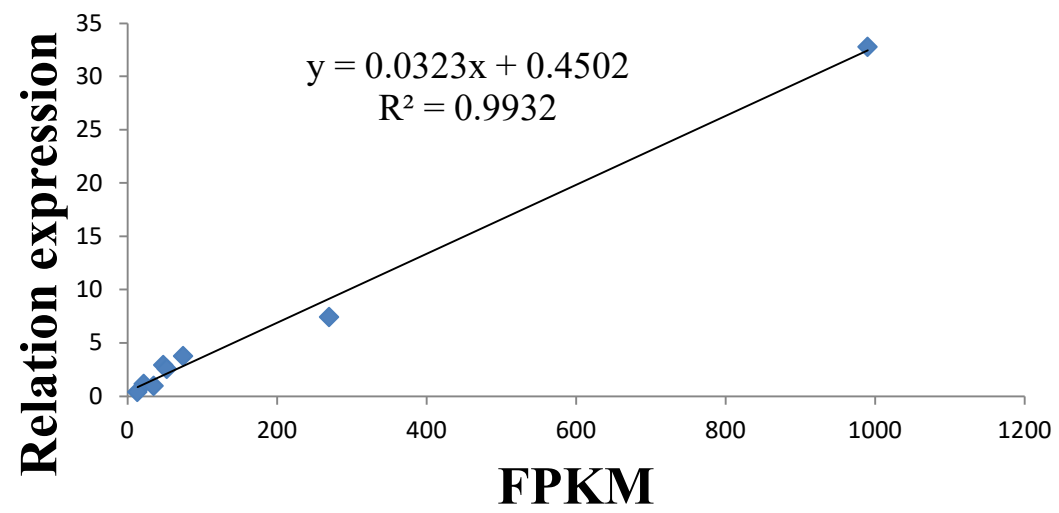

***F3'H***

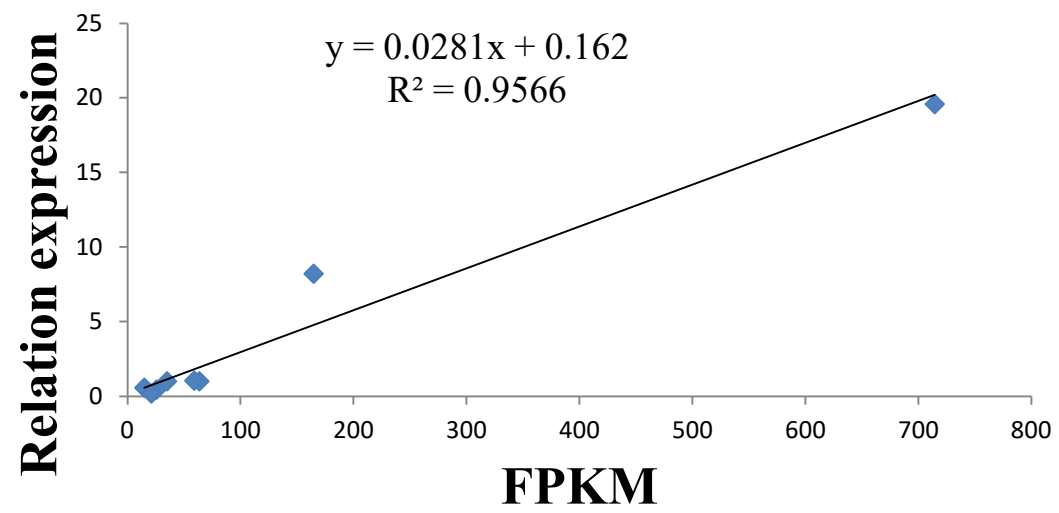

# ***DFR***

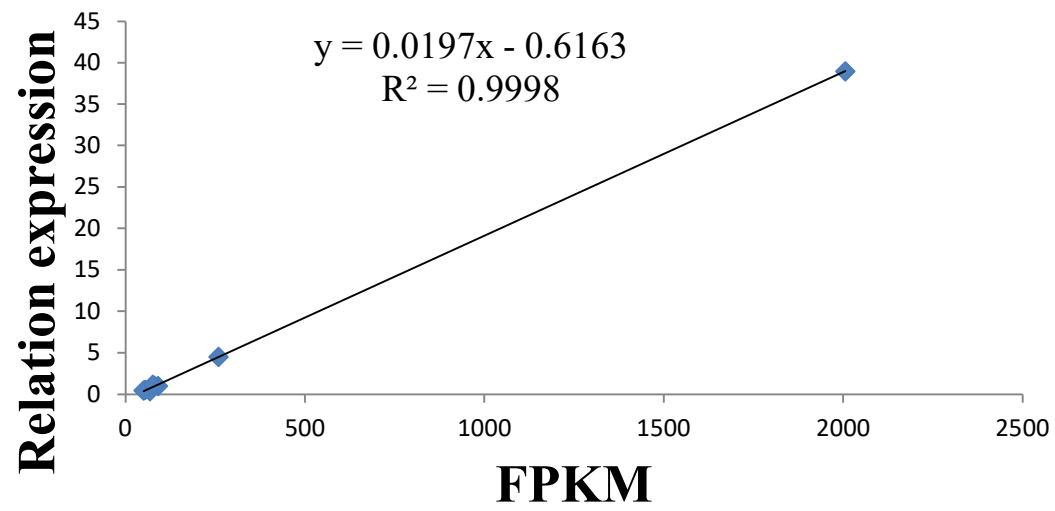

*ANS*

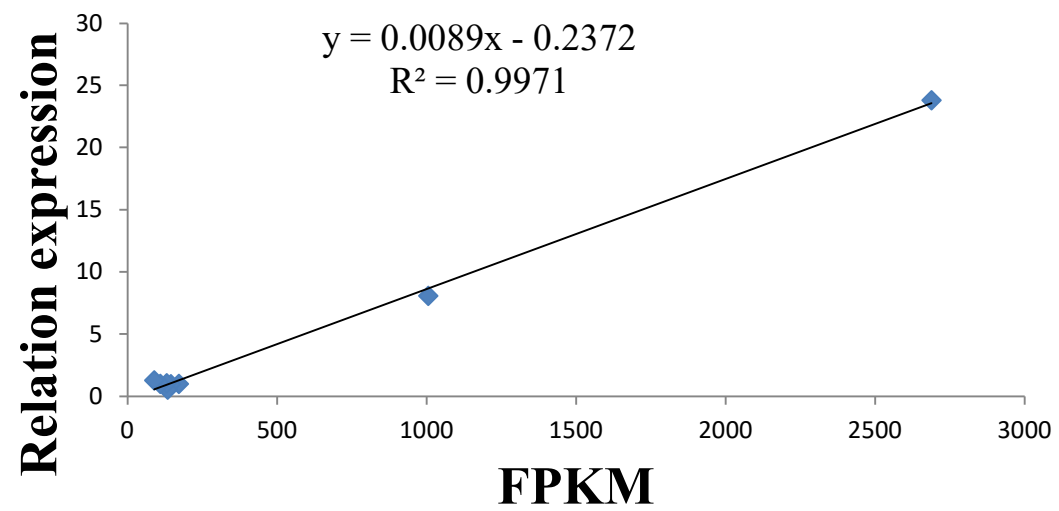

# *UFGT*

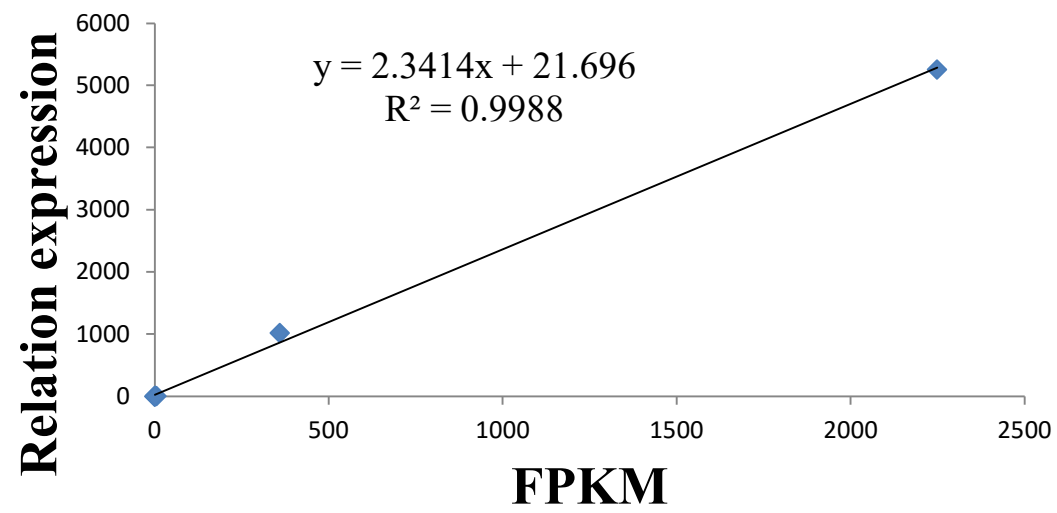

***PDS***

$$y = 0.0422x + 0.0052$$

$$R^2 = 0.6437$$

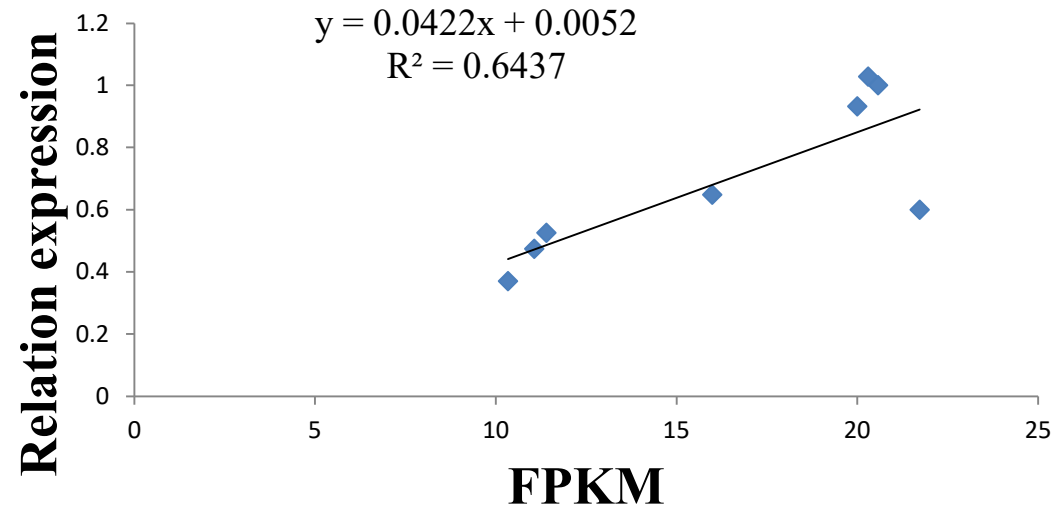

# ***HYB/BCH***

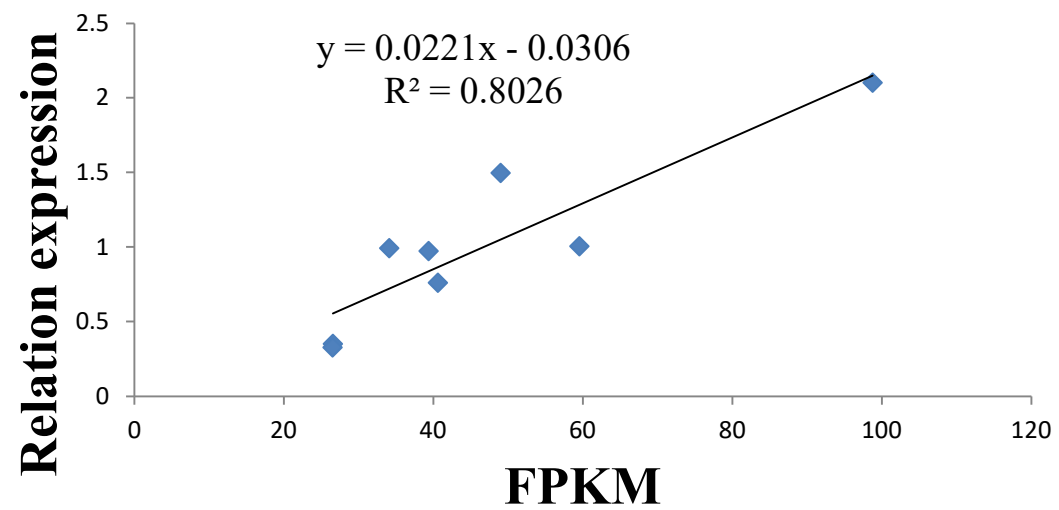

# ***LCY-B***

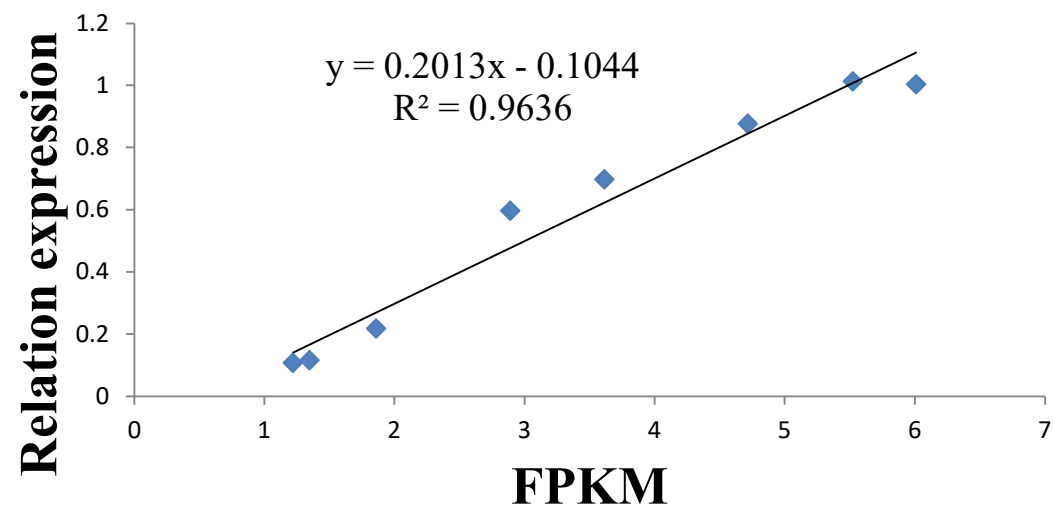

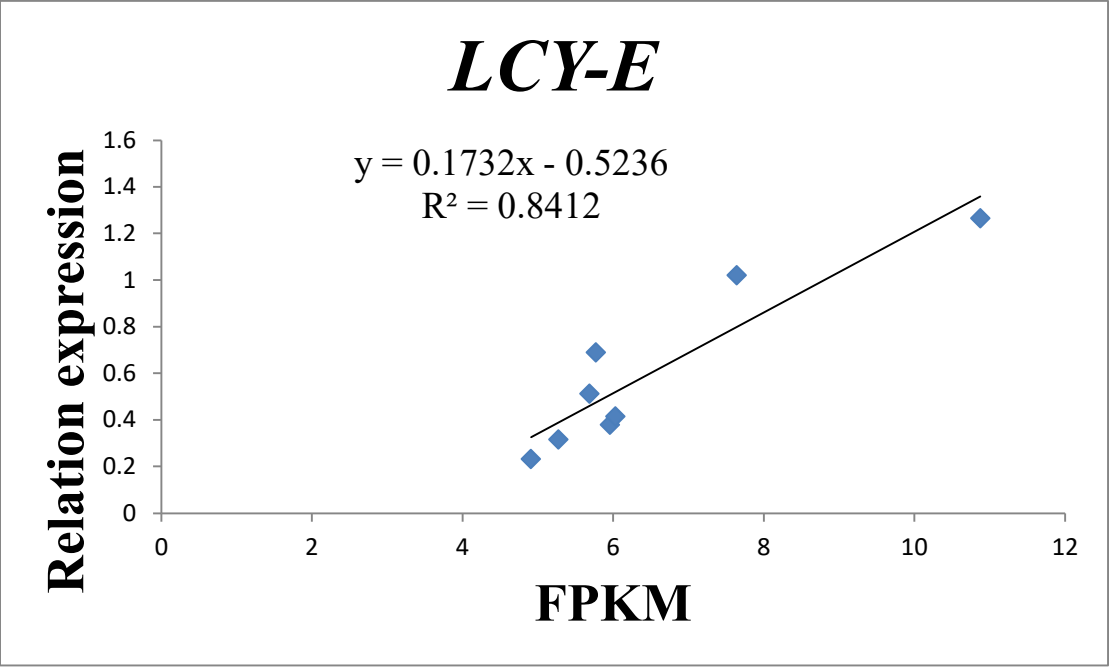

**Figure S4.** Correlation ( $R^2$ ) of the expression levels of the 11 genes (*CHS*, *CHI*, *F3H*, *F3'H*, *DFR*, *ANS*, *UFGT*, *PDS*, *HYB*, *LCYB*, *LCYE*) measured by qRT-PCR and RNA-seq.

**Table S1.** Basic information of reference genome.

|                         |                                           |
|-------------------------|-------------------------------------------|
| NCBI Reference Sequence | NW_018922178.1                            |
| Assembly Provider       | Kazusa DNA Research Institute             |
| Assembly Method         | SOAPdenovo v. 2-rev240; GapCloser v. 1.10 |
| Assembly Name           | PAV_r1.0                                  |
| Genome Coverage         | 327x                                      |
| Sequencing Technology   | Illumina HiSeq 2000                       |

**Table S2.** The assembly statistic of the RNA-seq in this study.

|                            | PAV_r1.0    |
|----------------------------|-------------|
| Estimated genome size (bp) | 352,883,670 |
| Number of scaffolds        | 10,148      |
| Size of scaffolds (bp)     | 272,361,615 |
| Scaffold N50 (bp)          | 219,566     |
| Longest scaffold (bp)      | 1,460,269   |
| GC (%)                     | 37.7        |
| Mean size of genes (bp)    | 1,097       |
| Repeat (%)                 | 43.8        |

**Table S3.** The FPKM values underlying the heatmap from the transcriptome mapping data.

| Gene name   | Gene ID           | Gene length | FPKM <sup>a</sup> |         |         |         |         |         |          |         |
|-------------|-------------------|-------------|-------------------|---------|---------|---------|---------|---------|----------|---------|
|             |                   |             | Stage 1           |         | Stage 2 |         | Stage 3 |         | Stage 4  |         |
|             |                   |             | JNH_S1            | CY_S1   | JNH_S2  | CY_S2   | JNH_S3  | CY_S3   | JNH_S4   | CY_S4   |
| <i>PAL</i>  | 110748671         | 1807        | 15.480            | 67.217  | 19.723  | 50.550  | 47.043  | 5.930   | 184.357  | 2.460   |
| <i>C4H</i>  | 110750787         | 3544        | 266.053           | 680.623 | 304.750 | 267.917 | 375.540 | 208.727 | 1315.527 | 305.510 |
| <i>4CL</i>  | 110758567         | 3818        | 7.583             | 7.287   | 6.703   | 4.293   | 21.180  | 3.270   | 169.313  | 2.047   |
| <i>CHS</i>  | 110758924         | 2440        | 2.583             | 6.593   | 6.580   | 0.707   | 17.317  | 0.053   | 374.413  | 0.330   |
|             | BGI_novel_G000094 | 1897        | 3.310             | 6.577   | 4.577   | 1.220   | 20.067  | 0.130   | 397.700  | 0.573   |
| <i>CHI</i>  | 110745765         | 1443        | 18.920            | 57.477  | 25.193  | 12.927  | 183.110 | 10.247  | 924.200  | 8.013   |
| <i>F3H</i>  | 110758277         | 1994        | 34.690            | 74.277  | 52.360  | 47.783  | 269.347 | 21.393  | 989.887  | 13.070  |
| <i>F3'H</i> | 110753332         | 2528        | 63.473            | 35.080  | 58.933  | 25.510  | 164.737 | 14.793  | 714.377  | 21.210  |

|                |           |       |         |         |        |         |          |         |          |         |
|----------------|-----------|-------|---------|---------|--------|---------|----------|---------|----------|---------|
| <i>DFR</i>     | 110771557 | 2252  | 80.493  | 90.483  | 76.390 | 68.033  | 259.210  | 55.153  | 2006.030 | 50.067  |
| <i>ANS</i>     | 110747768 | 1667  | 109.233 | 172.197 | 89.220 | 145.413 | 1005.627 | 134.663 | 2688.480 | 131.307 |
| <i>UFGT</i>    | 110749579 | 1702  | 0.617   | 0.330   | 0.557  | 0.243   | 359.253  | 5.250   | 2248.373 | 1.953   |
| <i>PSY</i>     | 110765927 | 2783  | 17.750  | 19.423  | 16.827 | 13.423  | 8.380    | 3.957   | 7.380    | 4.293   |
| <i>PDS</i>     | 110747173 | 10762 | 20.300  | 20.573  | 19.997 | 21.723  | 15.983   | 11.063  | 11.397   | 10.333  |
| <i>HYB/BCH</i> | 110767732 | 2315  | 59.533  | 98.763  | 39.383 | 40.633  | 26.550   | 34.103  | 26.537   | 49.017  |
| <i>LCY-B</i>   | 110770275 | 3176  | 6.010   | 5.523   | 4.717  | 3.613   | 2.890    | 1.860   | 1.347    | 1.220   |
| <i>LCY-E</i>   | 110749277 | 4150  | 7.640   | 10.873  | 5.273  | 5.683   | 6.030    | 5.770   | 4.907    | 5.957   |
| <i>ZEP</i>     | 110765909 | 6573  | 21.923  | 28.263  | 17.820 | 13.347  | 59.350   | 39.347  | 39.813   | 49.280  |

---

<sup>a</sup> FPKM= total exon fragments / mapped reads (millions) \* exon length (kb)

**Table S4.** Specific primers pairs for selected genes used in qRT-PCR.

| Primers                           | Sequences (5'-3')      | Base (bp) |
|-----------------------------------|------------------------|-----------|
| <i>CHS-F</i>                      | CTTTGGGCATCTCGGATT     | 18        |
| <i>CHS-R</i>                      | TCAACAGTGAGTCCTGGTCC   | 20        |
| <i>CHI-F</i>                      | TCCACCGTCAGTCAAACCAC   | 20        |
| <i>CHI-R</i>                      | CCTCCAAGTACACGCCAATC   | 20        |
| <i>F3H-F</i>                      | TTGTGGAGGCTTGTGAGGAT   | 20        |
| <i>F3H-R</i>                      | AAATGGCTGGAGACGATGAA   | 20        |
| <i>F3'H-F</i>                     | TGTTGACTACTTTTGCTCTCGC | 21        |
| <i>F3'H-R</i>                     | GTTCTTGTTGGACTTGGGC    | 19        |
| <i>DFR-F</i>                      | GAATCTGTTGTGTGACGGG    | 19        |
| <i>DFR-R</i>                      | TCCATAGGAGTGGCGACAT    | 19        |
| <i>ANS-F</i>                      | GCTACCGCCGAGTATGCTAA   | 20        |
| <i>ANS-R</i>                      | TGGAACACACTTGGCAGAGA   | 20        |
| <i>UFGT-F</i>                     | ATGTCGGACCTTTCAACCTA   | 20        |
| <i>UFGT-R</i>                     | GGCACCACCATCCCATTACT   | 20        |
| <i>PDS-F</i>                      | CCTCTGTCGTCACCTCGATCA  | 20        |
| <i>PDS-R</i>                      | ATAATTGGCGGACAGGCATA   | 20        |
| <i>LCYE-F</i>                     | CAACTGGATATTGAGGGCATCA | 22        |
| <i>LCYE-R</i>                     | CAAGGAAACCGTGCCACATC   | 20        |
| <i>LCYB-F</i>                     | GGCTATATGGTGGCAAGGACTT | 21        |
| <i>LCYB-R</i>                     | CAGAATTGAGGCTTCGAACGA  | 22        |
| <i>HYB-F</i>                      | TTTGGGATGGCCTACATGTTC  | 21        |
| <i>HYB-R</i>                      | GGCACGTCGGCAATGG       | 16        |
| <i>LCYB2-F</i>                    | CCCTATTTCCATTAGGCCGC   | 20        |
| <i>LCYB2-R</i>                    | CACGTCATATCGAATACGATC  | 21        |
| <i><math>\beta</math>-ACTIN-F</i> | CCAGGGCTGTGTTTCCTTCTA  | 21        |
| <i><math>\beta</math>-ACTIN-R</i> | ATGATCTGCGTCATCTTTTCT  | 21        |
